# Supplementary material for: The impact of parental investment on lifetime reproductive success in Iceland
Source: PeerJ. 2017 Jan 19;5:e2904. doi: 10.7717/peerj.2904 (PMC5251940; doi:10.7717/peerj.2904)
Supplement: Supplemental Information 1 [file peerj-05-2904-s001.xlsx]

## Sheet: Sheet1
All variables log transformed averages and standardized (value- mean/ s.d) by decade
	Parents	proband to parents	proband to parents	proband to grandparent	proband to grandparent	proband to grandparent	Aunts and uncles	proband to full aunts and uncles	proband to full aunts and uncles	Full siblings	proband to full sibs	proband to full sibs	Half siblings	proband to half sibs	proband to half sibs
	r	N	S.E.	r	N	S.E.	r	N	S.E.	r	N	S.E.	r	N	S.E.
1700	0.121	3928	0.00802247				0.042	1237	0.0556519	0.21	3286	0.0326889	0.139	1011	0.0604815
1710	-0.049	3173	0.00903719				0.019	1850	0.0455649	0.143	2946	0.0353786	0.04	919	0.0645861
1720	-0.023	4081	0.00798333	0.055	1163	0.0573241	0.004	2566	0.0386995	0.122	3785	0.0313883	0.06	1017	0.0612693
1730	-0.081	3489	0.00858217	0.01	1684	0.0477717	0	2200	0.0417968	0.068	3221	0.0343807	0.057	977	0.0625342
1740	-0.104	4477	0.00754355	-0.004	2135	0.0424279	-0.01	2260	0.0412339	0.074	4047	0.0306449	0.062	1313	0.0539034
1750	-0.123	4940	0.00714996	-0.025	2276	0.0410671	0.035	2270	0.0410967	0.087	4440	0.0291954	0.047	1492	0.0506474
1760	-0.128	7467	0.00580799	0.016	3374	0.0337393	0.059	3343	0.0337861	0.111	6717	0.023622	0.1	2325	0.0402507
1770	-0.084	7721	0.00576581	0.015	3710	0.0321758	0.042	3661	0.0323407	0.133	6886	0.0232035	0.09	2802	0.0367339
1780	-0.018	7858	0.00575407	0.005	4549	0.0290626	0.07	4466	0.0291885	0.177	7061	0.0225959	0.08	3314	0.0338343
1790	-0.007	14497	0.00423739	0.003	9240	0.0203911	0.026	9085	0.0205506	0.148	13229	0.0166683	0.068	6287	0.0246069
1800	-0.073	11243	0.00478632	0.012	8302	0.0215094	0.032	8184	0.0216449	0.131	10323	0.0189608	0.078	4882	0.0278838
1810	-0.068	9324	0.00525961	0.021	7977	0.0219367	0.043	7895	0.0220193	0.112	8424	0.0210882	0.089	4539	0.0288649
1820	-0.107	15245	0.00408501	0.011	14135	0.0164843	0.044	14000	0.0165335	0.081	13762	0.0165986	0.069	7661	0.0222879
1830	-0.091	17649	0.00380877	0.001	16556	0.0152332	0.045	16402	0.0152736	0.098	15982	0.0153555	0.074	9031	0.0205129
1840	-0.096	16998	0.00387737	0.006	16114	0.0154402	0.031	15915	0.015522	0.097	15527	0.0155819	0.051	8937	0.0206801
1850	-0.081	20741	0.0035195	0.003	19945	0.0138786	0.023	19677	0.0139655	0.096	19124	0.0140429	0.055	10257	0.0192953
1860	-0.073	20794	0.00351937	0.001	20012	0.0138555	0.023	20012	0.0138482	0.103	19137	0.0140184	0.052	9734	0.0198133
1870	-0.039	19343	0.00366296	-0.009	18934	0.0142433	0.01	18717	0.0143254	0.115	17587	0.0145845	0.068	8600	0.0210387
1880	0.004	19715	0.0036337	-0.013	19263	0.0141199	0.038	19054	0.014179	0.146	17892	0.0143411	0.074	7755	0.0221365
1890	0.033	22839	0.00337242	0.007	22383	0.0131004	0.043	22158	0.0131431	0.139	20999	0.0132646	0.075	8091	0.0216687
1900	0.021	22433	0.00340501	0.001	21819	0.0132693	0.035	21632	0.0133102	0.126	20886	0.0133472	0.039	7120	0.0231945
1910	0.004	23465	0.0033307	0.007	22770	0.0129886	0.056	22590	0.013	0.121	21932	0.0130413	0.033	7196	0.0230817
